# Supplementary material
Source: Springer Nature journal article supplement (https://www.springermedizin.de/resource/supplementary/12936_2014_3176_MOESM8_ESM.pdf/9545226)
Supplement: MOESM8 [file 9545226]

**FEVER**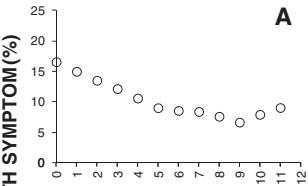**HISTORY OF FEVER**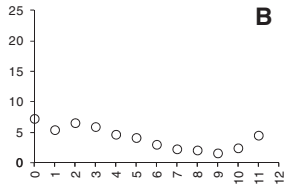**HEADACHE**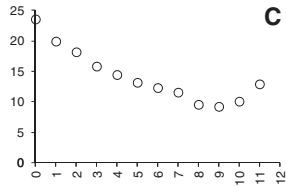**COUGH**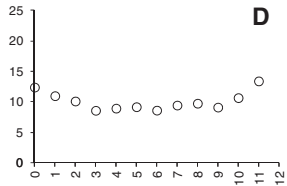**DIARRHEA**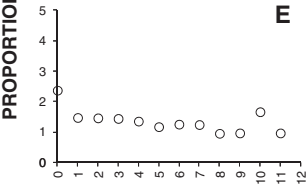**VOMITTING**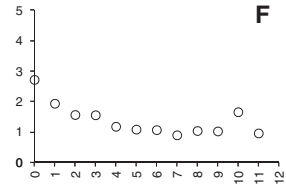**CHEST - PAIN**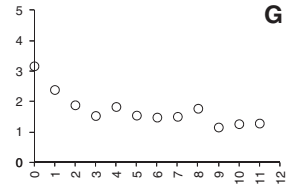**BREATHING PROBLEMS**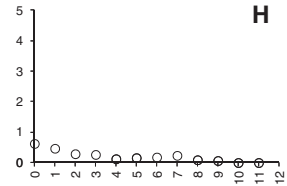

**NUMBER OF PRECEDING TESTS PER INDIVIDUAL**
